# Supplementary material for: Solvatochromic shifts of single-walled carbon nanotubes in nonpolar microenvironments
Source: Royal Society of Chemistry journal article supplement (doi:10.1039/b927053a), 2010-01-01
Supplement: b927053a.pdf [file b927053a.pdf]

B927053A

Supporting information

## Solvatochromic shifts of single-walled carbon nanotubes in nonpolar microenvironments

Carlos A. Silvera-Batista,<sup>a</sup> Randy K. Wang,<sup>a</sup> Philip Weinberg,<sup>a</sup> and Kirk J. Ziegler<sup>\*,a,b,c</sup><sup>a</sup> Department of Chemical Engineering, <sup>b</sup> Department of Materials Science and Engineering and  
<sup>c</sup> Center for Surface Science and Engineering, University of Florida, Gainesville, Florida 32611

E-mail: kziegler@che.ufl.edu

### Deconvolution of the spectra

Figure S1 shows a typical simulated curve (red) compared to the experimental curve (blue) as well as the deconvoluted peaks corresponding to each  $(n,m)$  type. The simulated curve shows a good fit to the experimental curve. The peaks for each  $(n,m)$  component are shown under the simulated curve. Note that the attached solvent characterization sheets show the deconvolution for all PL spectra.

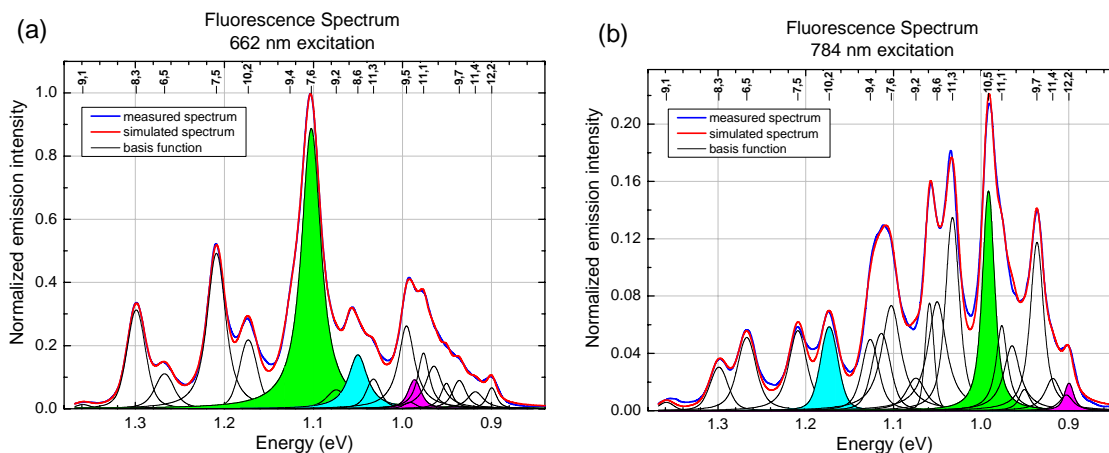

Figure S1: Deconvolution of PL emission spectra for excitation at (a) 662 and (b) 784 nm. Weighting factors were assigned to each peak based on the amount of overlap with other peaks and the intensity. Those peaks highlighted in (a) show examples of the three weighting factors associated with overlap while (b) shows those associated with intensity. The green, blue, and purple curves were assigned values of 1, 0.5, and 0.25, respectively.

### Solvent characterization sheets

The results of each solvent are summarized in the following sheets for easy reference. These data sheets include the PL emission from excitation at 662 and 784 nm, the absorbance spectrum for the pure solvent, comparison of the absorbance and PL emission spectra, and a table of the peak position and solvatochromic shift of each  $(n,m)$  type.

## Hexane ( $\epsilon = 1.89$ , $\eta = 1.37$ , $D = 0$ , $f(\eta^2) = 0.369$ )

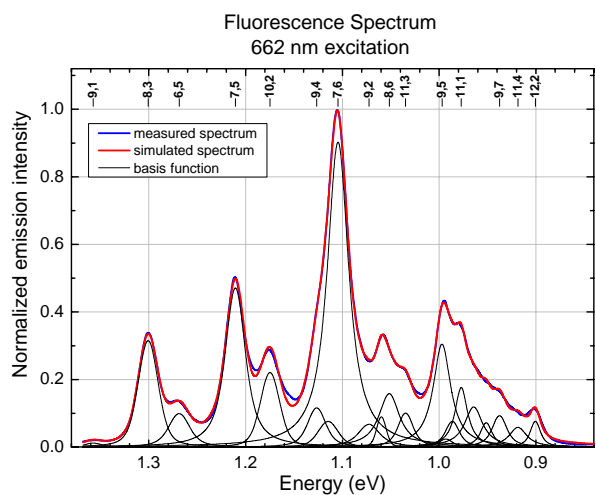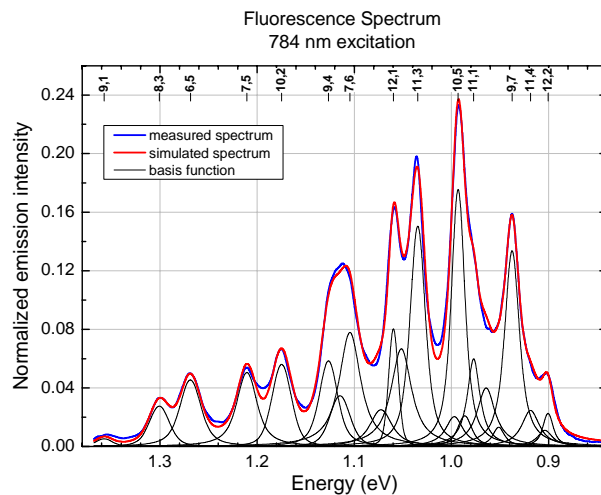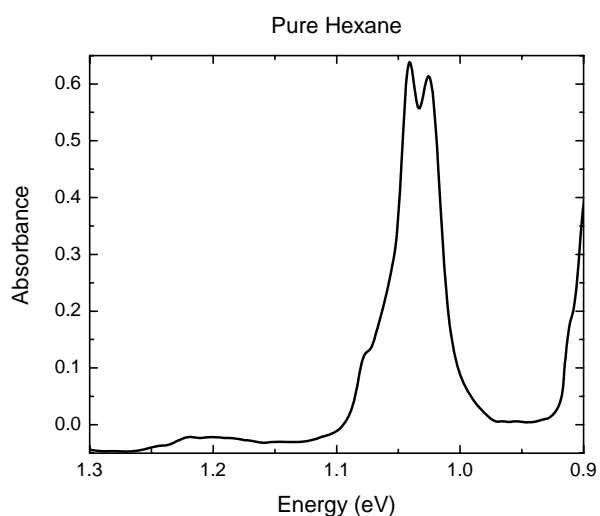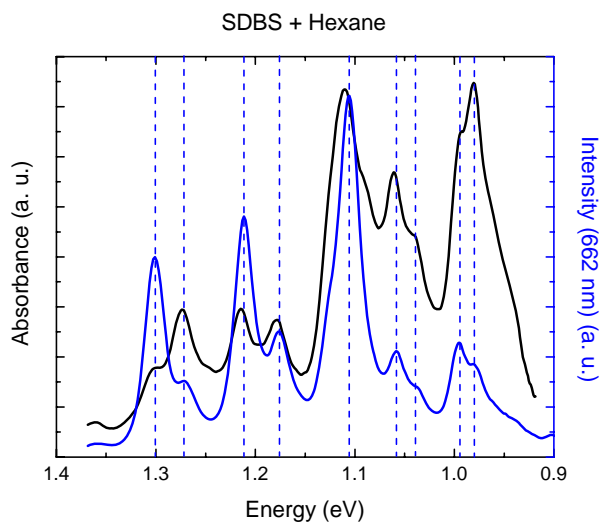

| Type    | $E_{11}$ (eV) | $E_{11}$ Shift (meV) <sup>a</sup> |
|---------|---------------|-----------------------------------|
| (8, 3)  | 1.301         | 67                                |
| (6, 5)  | 1.269         | 83                                |
| (7, 5)  | 1.211         | 63                                |
| (10, 2) | 1.175         | 49                                |
| (9, 4)  | 1.127         | 44                                |
| (7, 6)  | 1.104         | 56                                |
| (12, 1) | 1.060         | 33                                |
| (8, 6)  | 1.052         | 48                                |
| (11, 3) | 1.035         | 33                                |
| (9, 5)  | 0.997         | 46                                |
| (10, 5) | 0.993         | 31                                |
| (11, 1) | 0.977         | 81                                |
| (9, 7)  | 0.938         | 30                                |
| (12, 2) | 0.901         | 50                                |

<sup>a</sup> Shift in comparison to fluorescence emission for SWNTs in air

# Heptane ( $\epsilon = 1.92, \eta = 1.39, D = 0, f(\eta^2) = 0.383$ )

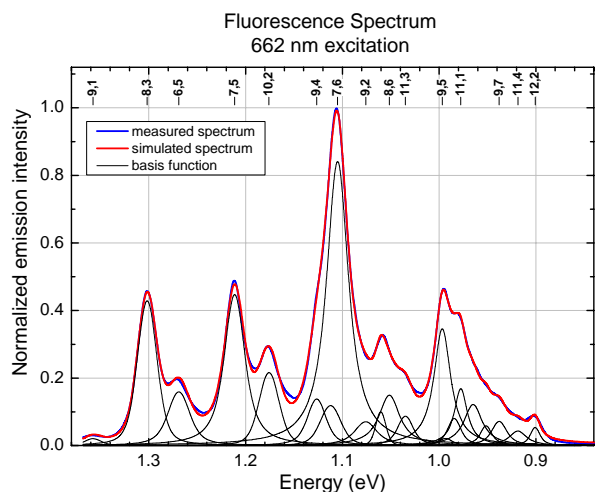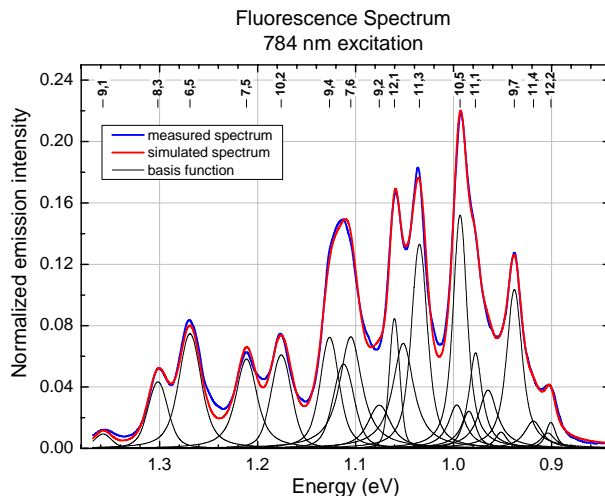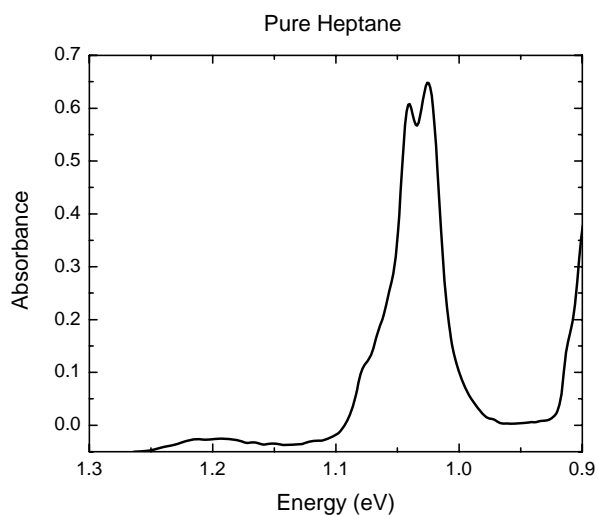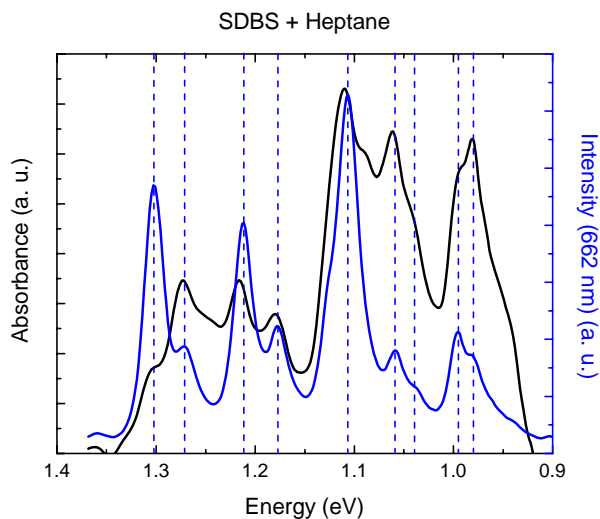

| Type    | $E_{11}$ (eV) | $E_{11}$ Shift (meV) <sup>a</sup> |
|---------|---------------|-----------------------------------|
| (8, 3)  | 1.302         | 66                                |
| (6, 5)  | 1.269         | 83                                |
| (7, 5)  | 1.211         | 63                                |
| (10, 2) | 1.176         | 48                                |
| (9, 4)  | 1.127         | 44                                |
| (7, 6)  | 1.105         | 55                                |
| (12, 1) | 1.060         | 33                                |
| (8, 6)  | 1.051         | 49                                |
| (11, 3) | 1.035         | 33                                |
| (9, 5)  | 0.997         | 46                                |
| (10, 5) | 0.993         | 31                                |
| (11, 1) | 0.978         | 80                                |
| (9, 7)  | 0.938         | 30                                |
| (12, 2) | 0.901         | 50                                |

<sup>a</sup> Shift in comparison to fluorescence emission for SWNTs in air

**Cyclohexane** ( $\epsilon = 2.02$ ,  $\eta = 1.43$ ,  $D = 0$ ,  $f(\eta^2) = 0.411$ )

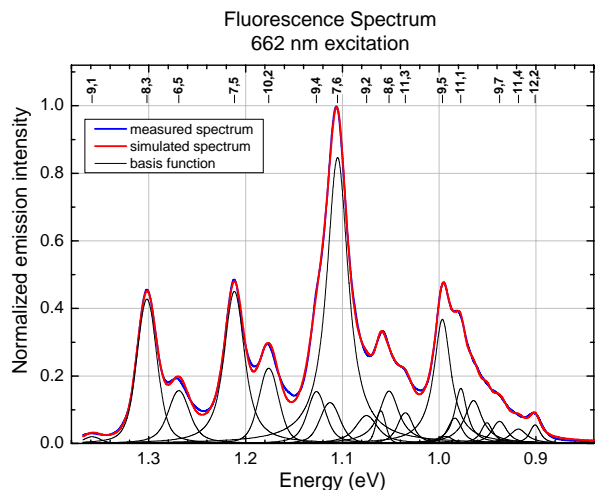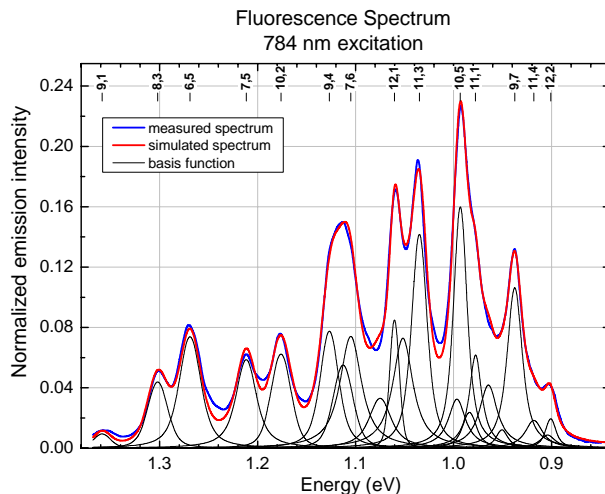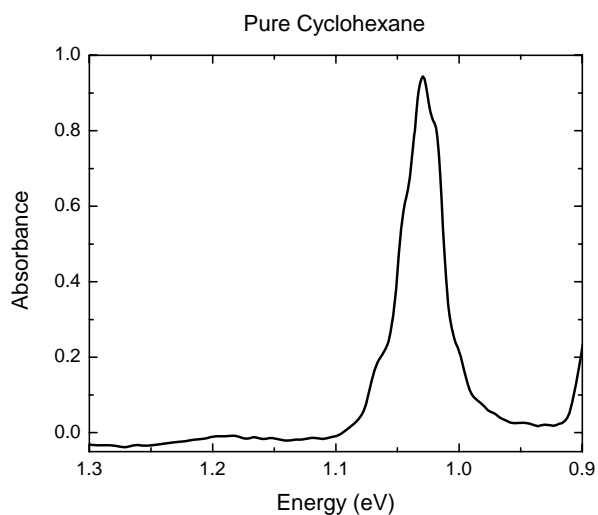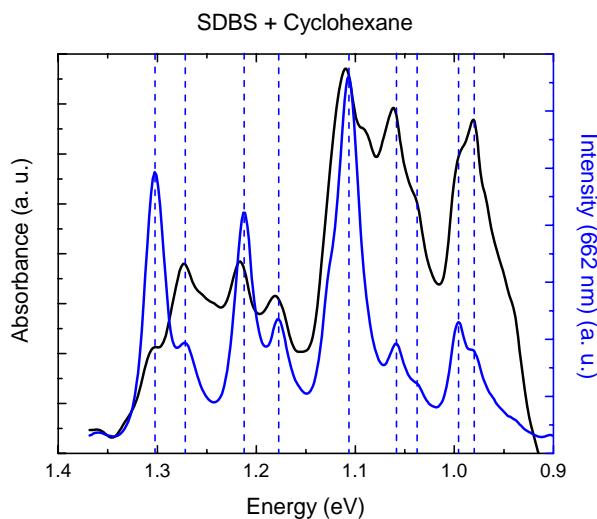

| Type    | $E_{11}$ (eV) | $E_{11}$ Shift (meV) <sup>a</sup> |
|---------|---------------|-----------------------------------|
| (8, 3)  | 1.302         | 66                                |
| (6, 5)  | 1.269         | 83                                |
| (7, 5)  | 1.212         | 62                                |
| (10, 2) | 1.176         | 48                                |
| (9, 4)  | 1.127         | 44                                |
| (7, 6)  | 1.105         | 55                                |
| (12, 1) | 1.060         | 33                                |
| (8, 6)  | 1.052         | 48                                |
| (11, 3) | 1.035         | 33                                |
| (9, 5)  | 0.997         | 46                                |
| (10, 5) | 0.993         | 31                                |
| (11, 1) | 0.978         | 80                                |
| (9, 7)  | 0.938         | 30                                |
| (12, 2) | 0.901         | 50                                |

<sup>a</sup> Shift in comparison to fluorescence emission for SWNTs in air

# Carbon Tetrachloride ( $\epsilon = 2.23$ , $\eta = 1.4$ , $D = 0$ , $f(\eta^2) = 0.430$ )

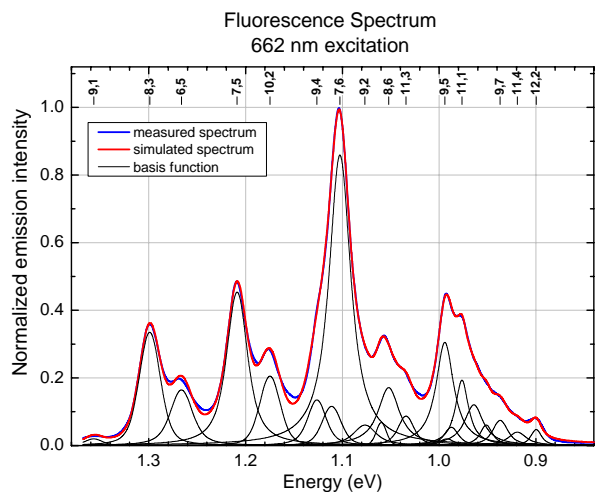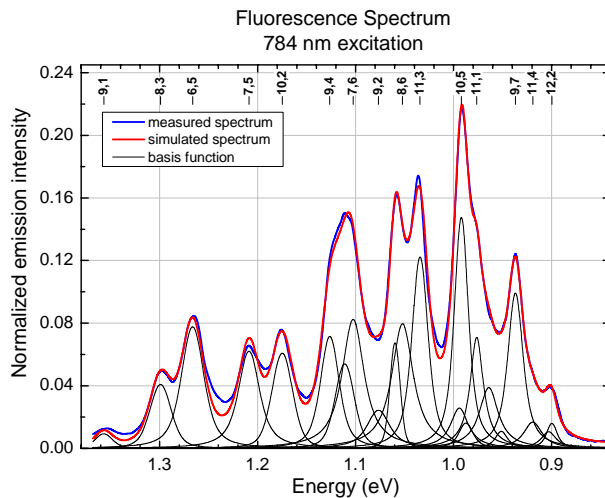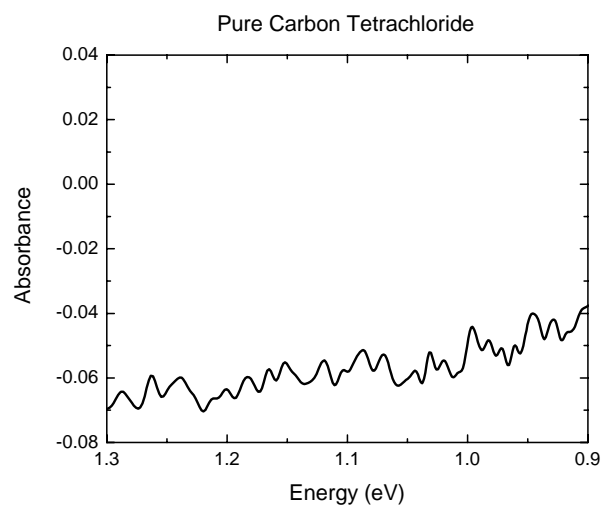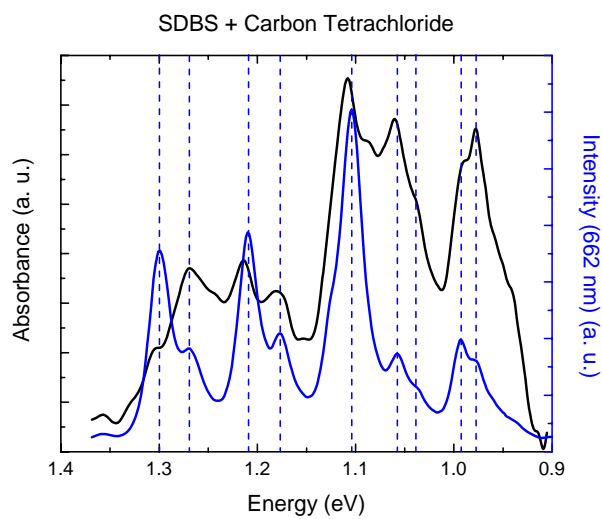

| Type    | $E_{11}$ (eV) | $E_{11}$ Shift (meV) <sup>a</sup> |
|---------|---------------|-----------------------------------|
| (8, 3)  | 1.299         | 69                                |
| (6, 5)  | 1.266         | 86                                |
| (7, 5)  | 1.209         | 65                                |
| (10, 2) | 1.175         | 49                                |
| (9, 4)  | 1.126         | 45                                |
| (7, 6)  | 1.103         | 57                                |
| (12, 1) | 1.060         | 33                                |
| (8, 6)  | 1.052         | 48                                |
| (11, 3) | 1.034         | 34                                |
| (9, 5)  | 0.994         | 49                                |
| (10, 5) | 0.992         | 32                                |
| (11, 1) | 0.976         | 82                                |
| (9, 7)  | 0.937         | 31                                |
| (12, 2) | 0.900         | 51                                |

<sup>a</sup> Shift in comparison to fluorescence emission for SWNTs in air

***p*-Xylene** ( $\varepsilon = 2.27, \eta = 1.50, D = 0, f(\eta^2) = 0.455$ )

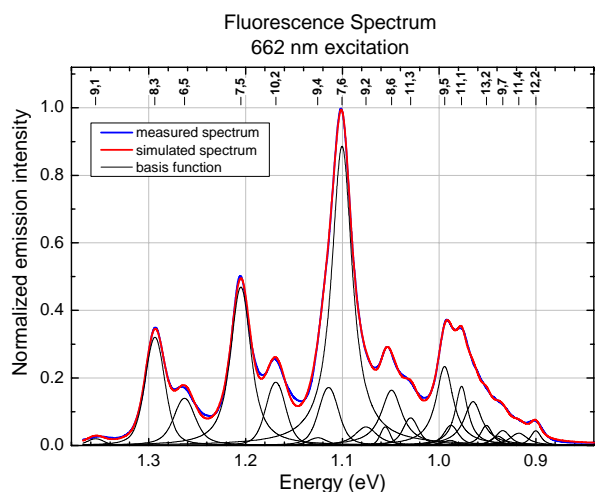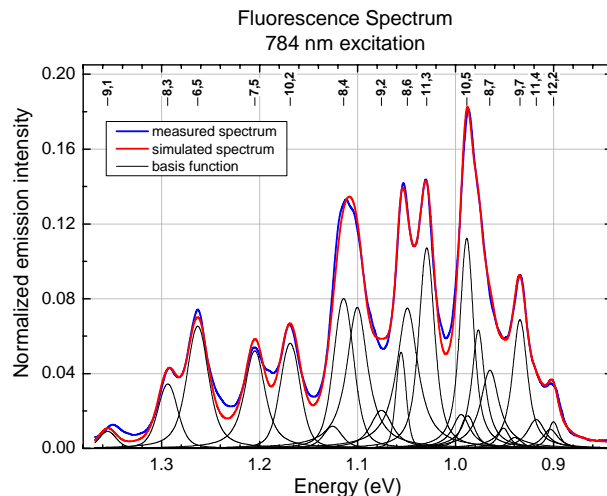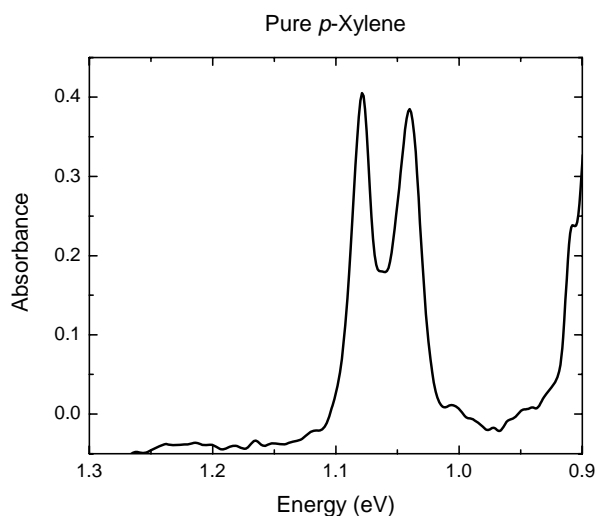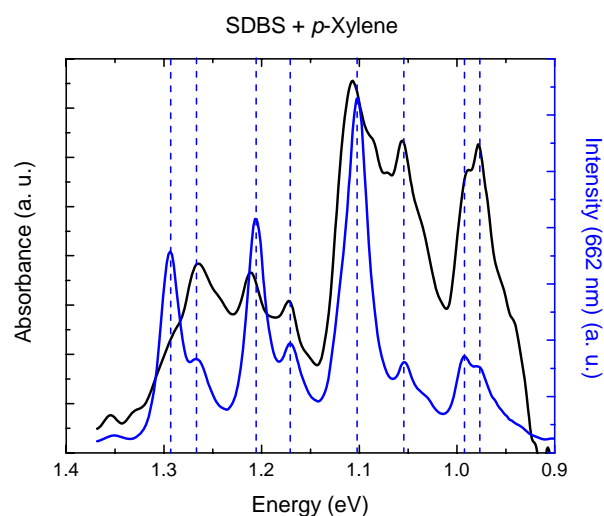

| Type    | $E_{11}$ (eV) | $E_{11}$ Shift (meV) <sup>a</sup> |
|---------|---------------|-----------------------------------|
| (8, 3)  | 1.294         | 74                                |
| (6, 5)  | 1.263         | 89                                |
| (7, 5)  | 1.205         | 69                                |
| (10, 2) | 1.169         | 55                                |
| (9, 4)  | 1.125         | 46                                |
| (7, 6)  | 1.100         | 60                                |
| (12, 1) | 1.056         | 37                                |
| (8, 6)  | 1.049         | 51                                |
| (11, 3) | 1.029         | 39                                |
| (9, 5)  | 0.994         | 49                                |
| (10, 5) | 0.989         | 35                                |
| (11, 1) | 0.977         | 81                                |
| (9, 7)  | 0.934         | 34                                |
| (12, 2) | 0.900         | 51                                |

<sup>a</sup> Shift in comparison to fluorescence emission for SWNTs in air

**Benzene** ( $\epsilon = 2.28$ ,  $\eta = 1.50$ ,  $D = 0$ ,  $f(\eta^2) = 0.455$ )

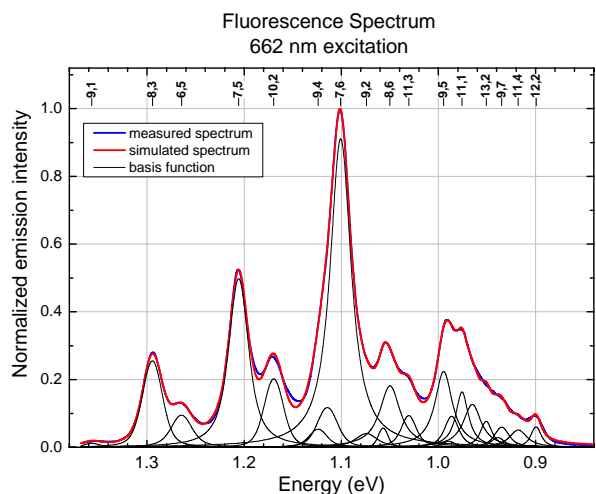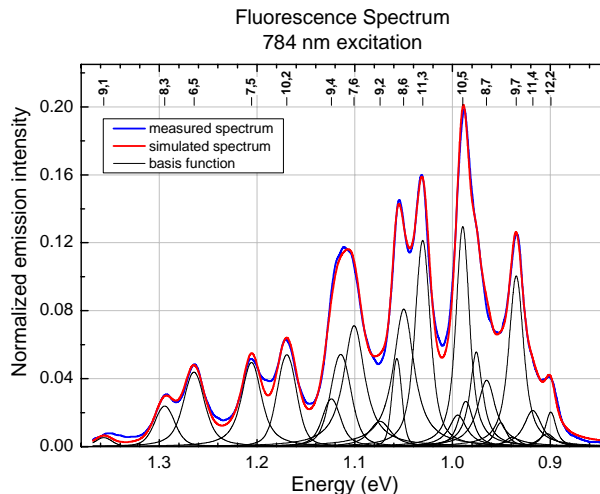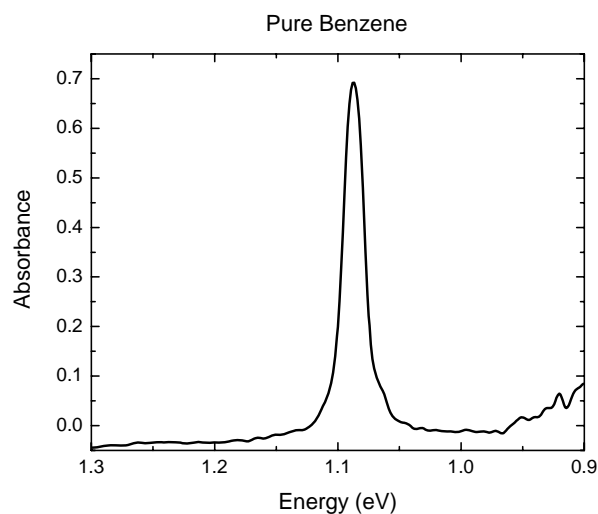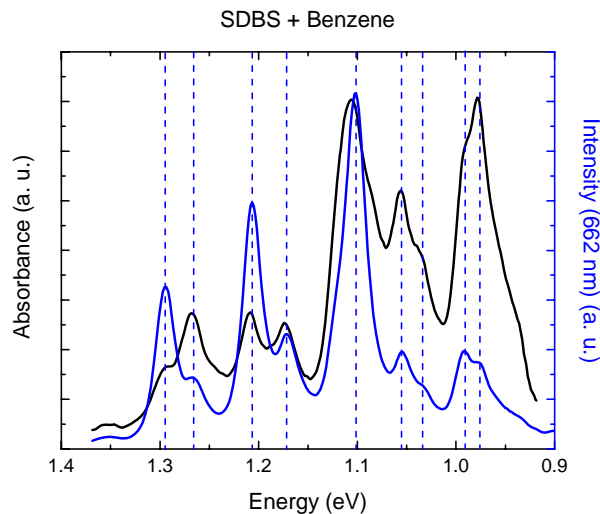

| Type    | $E_{11}$ (eV) | $E_{11}$ Shift (meV) <sup>a</sup> |
|---------|---------------|-----------------------------------|
| (8, 3)  | 1.294         | 74                                |
| (6, 5)  | 1.265         | 87                                |
| (7, 5)  | 1.206         | 68                                |
| (10, 2) | 1.170         | 54                                |
| (9, 4)  | 1.124         | 47                                |
| (7, 6)  | 1.101         | 59                                |
| (12, 1) | 1.057         | 36                                |
| (8, 6)  | 1.050         | 50                                |
| (11, 3) | 1.031         | 37                                |
| (9, 5)  | 0.995         | 48                                |
| (10, 5) | 0.990         | 34                                |
| (11, 1) | 0.976         | 82                                |
| (9, 7)  | 0.935         | 33                                |
| (12, 2) | 0.899         | 52                                |

<sup>a</sup> Shift in comparison to fluorescence emission for SWNTs in air

**Toluene** ( $\epsilon = 2.39, \eta = 1.50, D = 0.38, f(\eta^2) = 0.455$ )

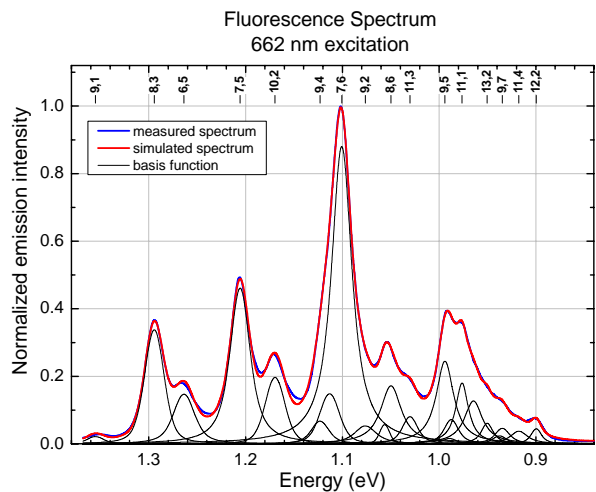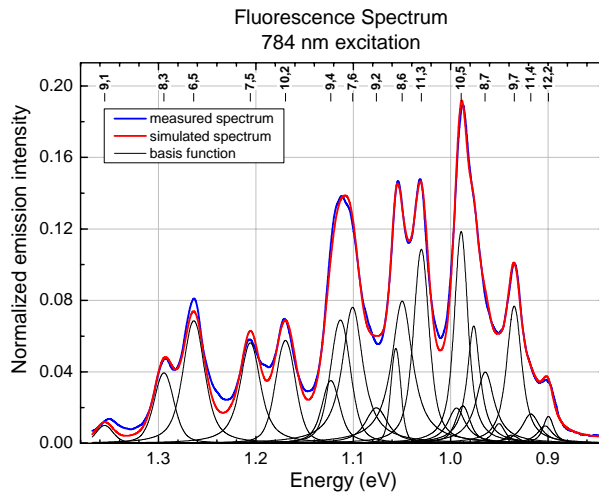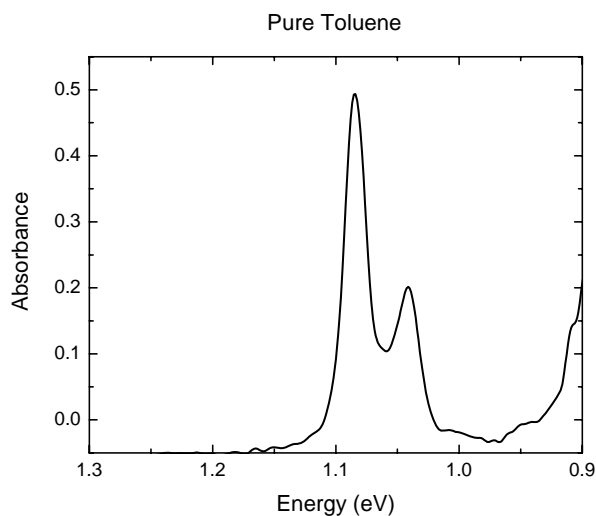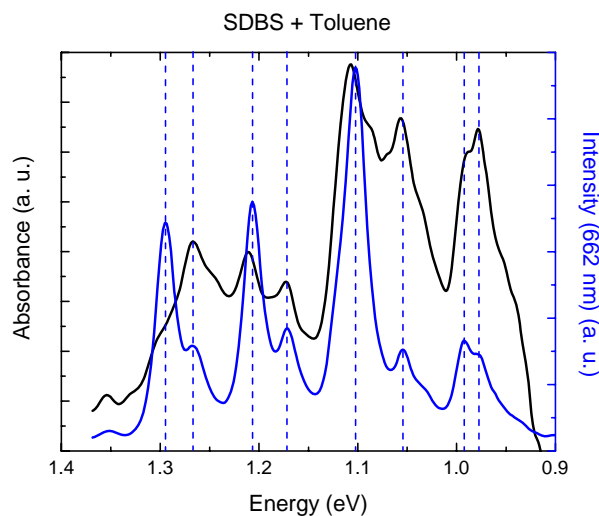

| Type    | $E_{11}$ (eV) | $E_{11}$ Shift (meV) <sup>a</sup> |
|---------|---------------|-----------------------------------|
| (8, 3)  | 1.294         | 74                                |
| (6, 5)  | 1.264         | 88                                |
| (7, 5)  | 1.206         | 68                                |
| (10, 2) | 1.170         | 54                                |
| (9, 4)  | 1.123         | 48                                |
| (7, 6)  | 1.101         | 59                                |
| (12, 1) | 1.056         | 37                                |
| (8, 6)  | 1.050         | 50                                |
| (11, 3) | 1.030         | 38                                |
| (9, 5)  | 0.994         | 49                                |
| (10, 5) | 0.989         | 35                                |
| (11, 1) | 0.976         | 82                                |
| (9, 7)  | 0.935         | 33                                |
| (12, 2) | 0.900         | 51                                |

<sup>a</sup> Shift in comparison to fluorescence emission for SWNTs in air



## 2, 6-Dichlorotoluene ( $\varepsilon = 3.36$ , $\eta = 1.55$ , $D = 0.83$ , $f(\eta^2) = 0.483$ )

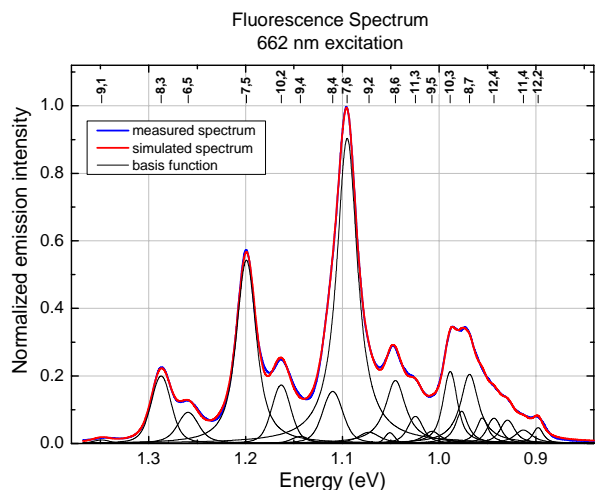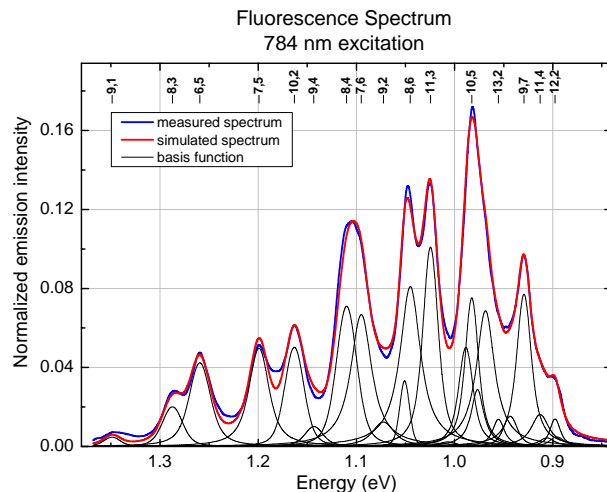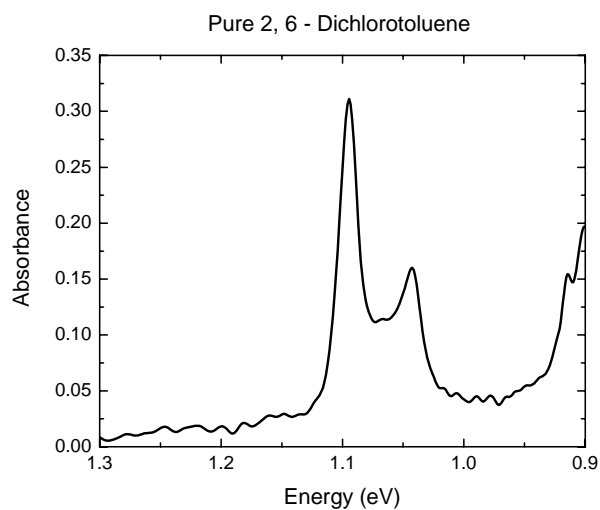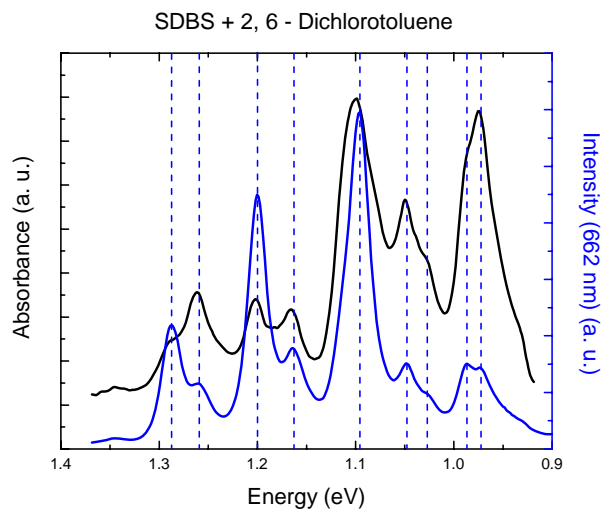

| Type    | $E_{11}$ (eV) | $E_{11}$ Shift (meV) <sup>a</sup> |
|---------|---------------|-----------------------------------|
| (8, 3)  | 1.287         | 81                                |
| (6, 5)  | 1.259         | 93                                |
| (7, 5)  | 1.199         | 75                                |
| (10, 2) | 1.163         | 61                                |
| (9, 4)  | 1.143         | 28                                |
| (7, 6)  | 1.095         | 65                                |
| (12, 1) | 1.051         | 42                                |
| (8, 6)  | 1.045         | 55                                |
| (11, 3) | 1.024         | 44                                |
| (9, 5)  | 1.007         | 36                                |
| (10, 5) | 0.983         | 41                                |
| (11, 1) | 0.977         | 81                                |
| (9, 7)  | 0.929         | 39                                |
| (12, 2) | 0.898         | 53                                |

<sup>a</sup> Shift in comparison to fluorescence emission for SWNTs in air

**Chloroform** ( $\epsilon = 4.81$ ,  $\eta = 1.45$ ,  $D = 1.04$ ,  $f(\eta^2) = 0.424$ )

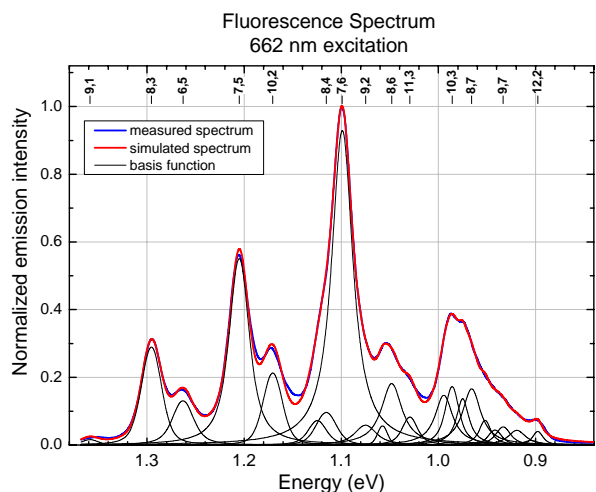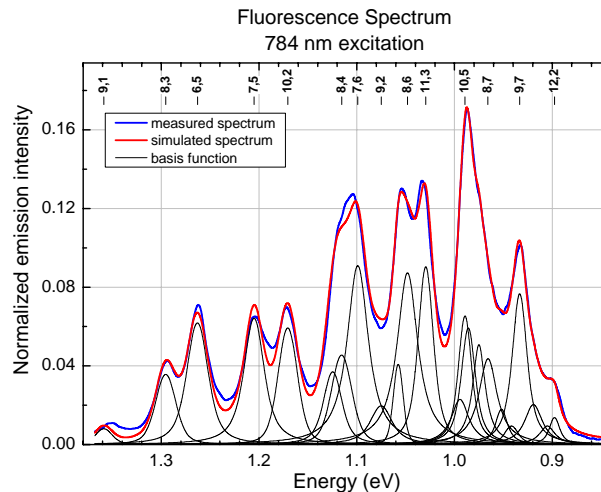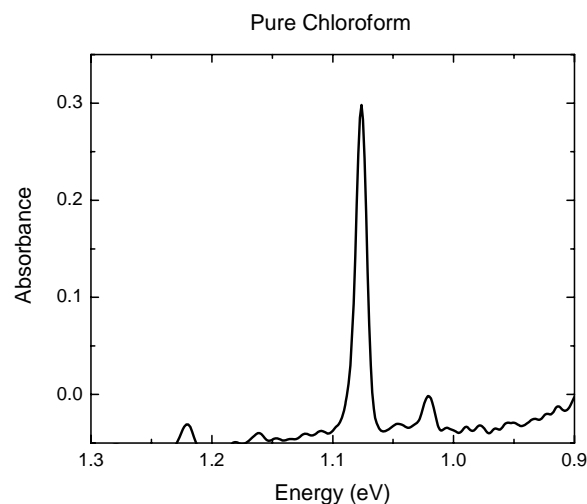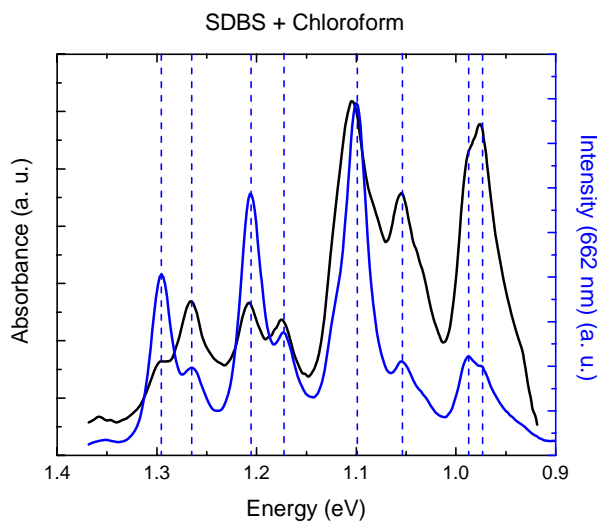

| Type    | $E_{11}$ (eV) | $E_{11}$ Shift (meV) <sup>a</sup> |
|---------|---------------|-----------------------------------|
| (8, 3)  | 1.295         | 73                                |
| (6, 5)  | 1.263         | 89                                |
| (7, 5)  | 1.205         | 69                                |
| (10, 2) | 1.171         | 53                                |
| (9, 4)  | 1.125         | 46                                |
| (7, 6)  | 1.099         | 61                                |
| (12, 1) | 1.058         | 35                                |
| (8, 6)  | 1.048         | 52                                |
| (11, 3) | 1.029         | 39                                |
| (9, 5)  | 0.994         | 49                                |
| (10, 5) | 0.989         | 35                                |
| (11, 1) | 0.975         | 83                                |
| (9, 7)  | 0.933         | 35                                |
| (12, 2) | 0.898         | 53                                |

<sup>a</sup> Shift in comparison to fluorescence emission for SWNTs in air

**1-Chlorohexane** ( $\epsilon = 6.10$ ,  $\eta = 1.42$ ,  $D = 1.94$ ,  $f(\eta^2) = 0.404$ )

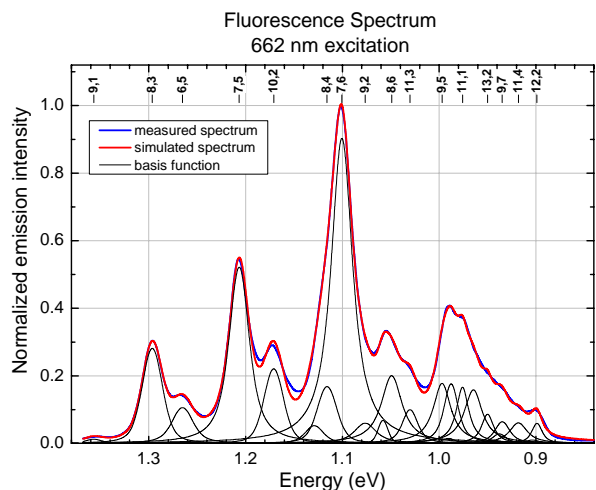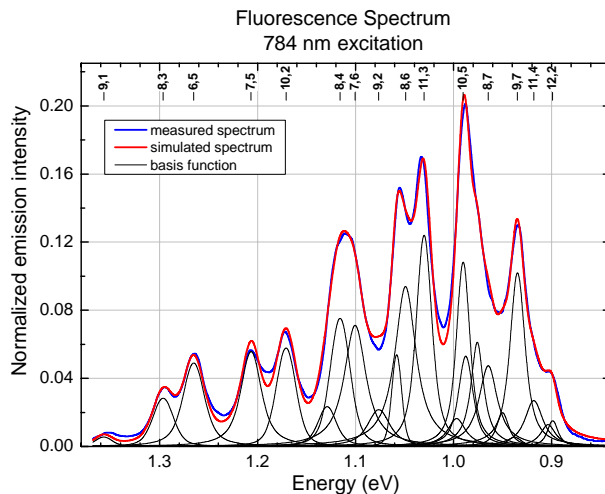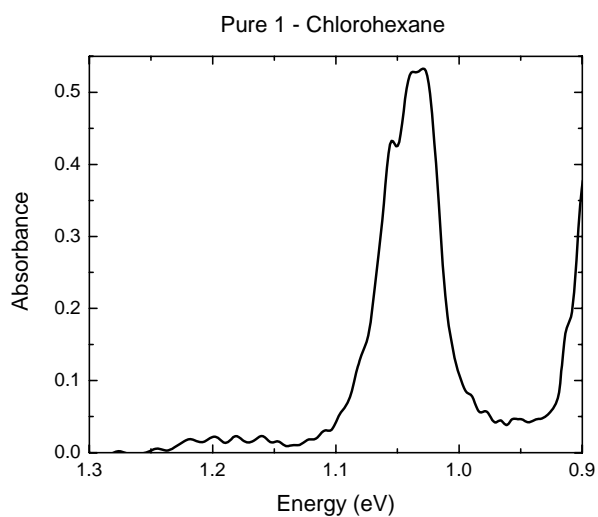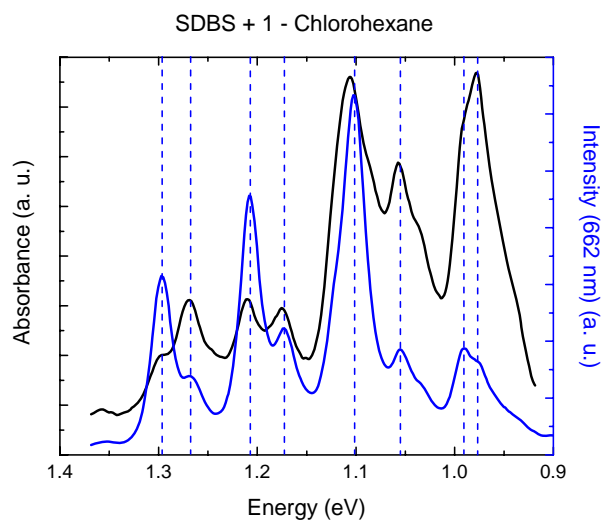

| Type    | $E_{11}$ (eV) | $E_{11}$ Shift (meV) <sup>a</sup> |
|---------|---------------|-----------------------------------|
| (8, 3)  | 1.296         | 72                                |
| (6, 5)  | 1.265         | 87                                |
| (7, 5)  | 1.207         | 67                                |
| (10, 2) | 1.171         | 53                                |
| (9, 4)  | 1.129         | 42                                |
| (7, 6)  | 1.100         | 60                                |
| (12, 1) | 1.058         | 35                                |
| (8, 6)  | 1.049         | 51                                |
| (11, 3) | 1.030         | 38                                |
| (9, 5)  | 0.997         | 46                                |
| (10, 5) | 0.990         | 34                                |
| (11, 1) | 0.976         | 82                                |
| (9, 7)  | 0.935         | 33                                |
| (12, 2) | 0.899         | 52                                |

<sup>a</sup> Shift in comparison to fluorescence emission for SWNTs in air

### 3-Heptanol ( $\varepsilon = 7.07$ , $\eta = 1.42$ , $D = 1.71$ , $f(\eta^2) = 0.404$ )

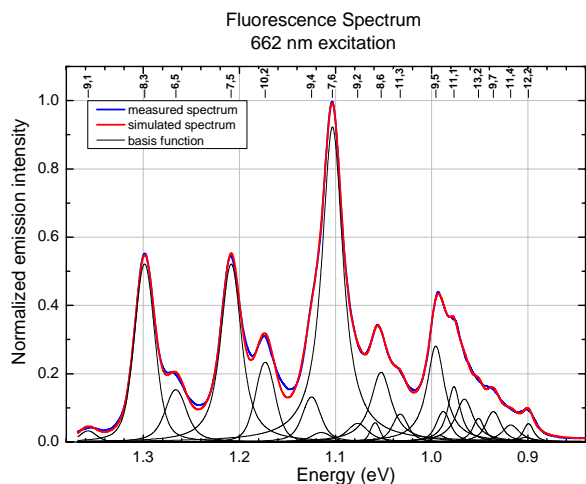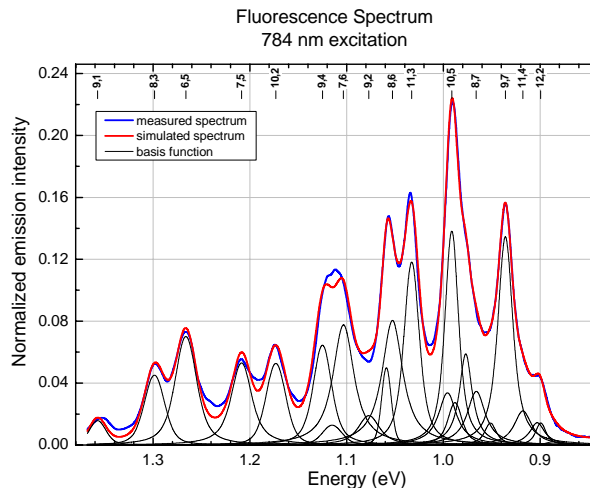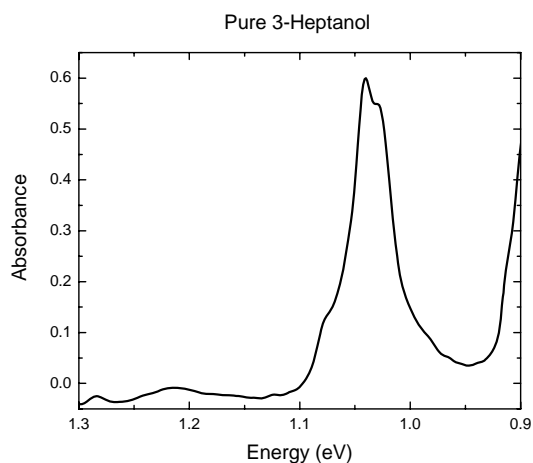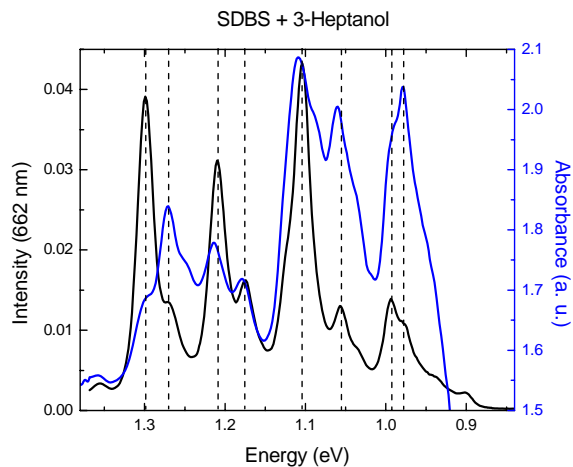

| Type    | $E_{11}$ (eV) | $E_{11}$ Shift (meV) <sup>a</sup> |
|---------|---------------|-----------------------------------|
| (8, 3)  | 1.299         | 69                                |
| (6, 5)  | 1.267         | 85                                |
| (7, 5)  | 1.209         | 65                                |
| (10, 2) | 1.173         | 51                                |
| (9, 4)  | 1.126         | 45                                |
| (7, 6)  | 1.102         | 58                                |
| (12, 1) | 1.059         | 34                                |
| (8, 6)  | 1.05          | 50                                |
| (11, 3) | 1.033         | 35                                |
| (9, 5)  | 0.995         | 48                                |
| (10, 5) | 0.992         | 32                                |
| (11, 1) | 0.976         | 82                                |
| (9, 7)  | 0.936         | 32                                |
| (12, 2) | 0.900         | 51                                |

<sup>a</sup> Shift in comparison to fluorescence emission for SWNTs in air

**1-Chlorobutane** ( $\epsilon = 7.28$ ,  $\eta = 1.40$ ,  $D = 2.05$ ,  $f(\eta^2) = 0.390$ )

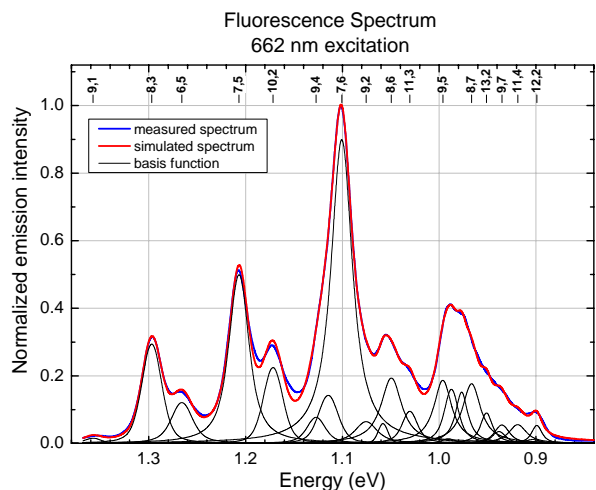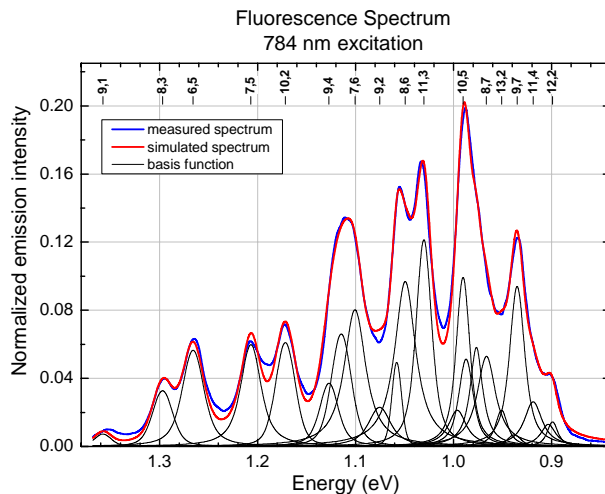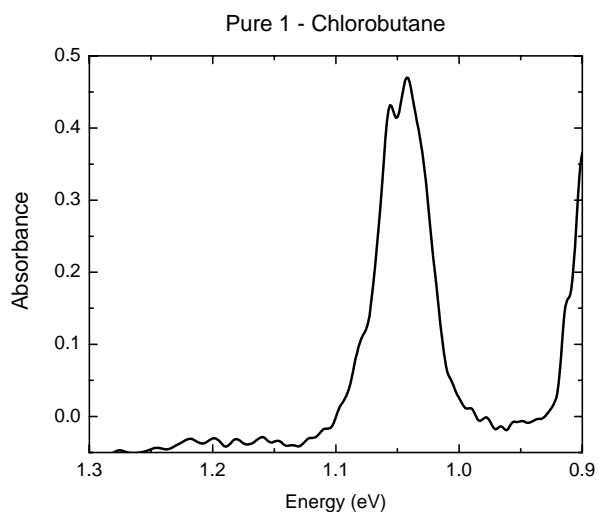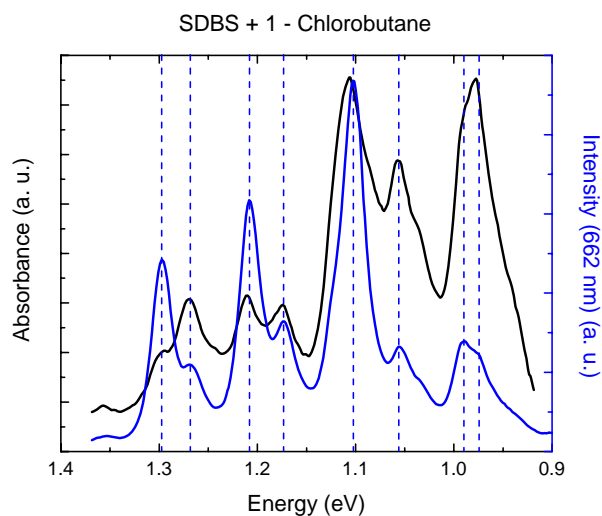

| Type    | $E_{11}$ (eV) | $E_{11}$ Shift (meV) <sup>a</sup> |
|---------|---------------|-----------------------------------|
| (8, 3)  | 1.297         | 71                                |
| (6, 5)  | 1.266         | 86                                |
| (7, 5)  | 1.207         | 67                                |
| (10, 2) | 1.172         | 52                                |
| (9, 4)  | 1.127         | 44                                |
| (7, 6)  | 1.101         | 59                                |
| (12, 1) | 1.058         | 35                                |
| (8, 6)  | 1.049         | 51                                |
| (11, 3) | 1.030         | 38                                |
| (9, 5)  | 0.996         | 47                                |
| (10, 5) | 0.990         | 34                                |
| (11, 1) | 0.977         | 81                                |
| (9, 7)  | 0.935         | 33                                |
| (12, 2) | 0.899         | 52                                |

<sup>a</sup> Shift in comparison to fluorescence emission for SWNTs in air

# 1, 6-Dichlorohexane ( $\epsilon = 8.60$ , $\eta = 1.46$ , $D = 2.03$ , $f(\eta^2) = 0.430$ )

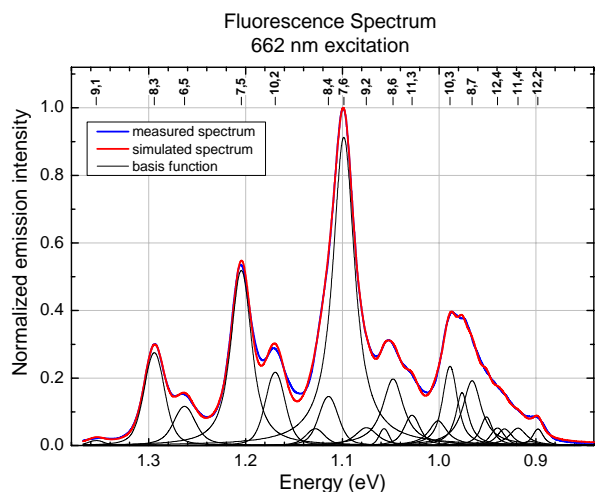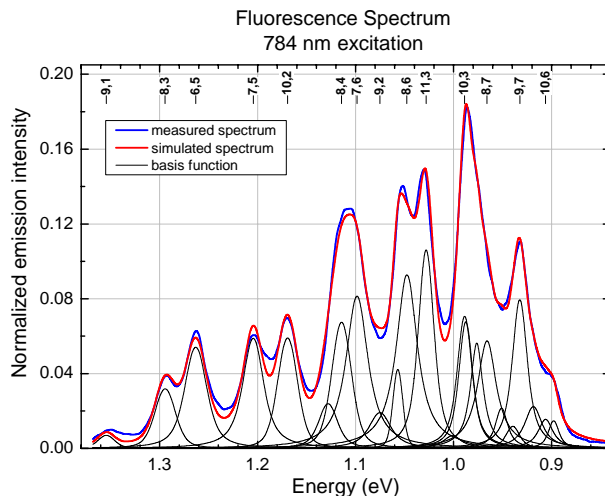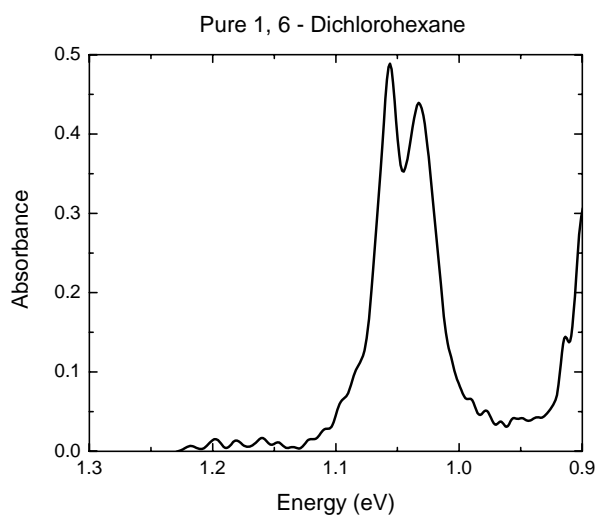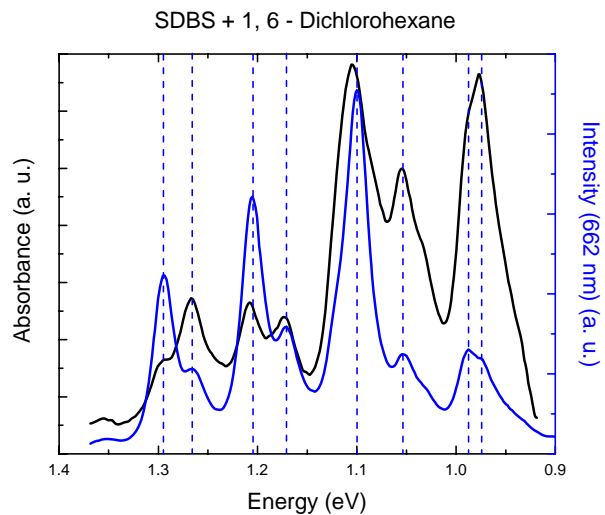

| Type    | $E_{11}$ (eV) | $E_{11}$ Shift (meV) <sup>a</sup> |
|---------|---------------|-----------------------------------|
| (8, 3)  | 1.294         | 74                                |
| (6, 5)  | 1.263         | 89                                |
| (7, 5)  | 1.204         | 70                                |
| (10, 2) | 1.169         | 55                                |
| (9, 4)  | 1.128         | 43                                |
| (7, 6)  | 1.099         | 61                                |
| (12, 1) | 1.057         | 36                                |
| (8, 6)  | 1.048         | 52                                |
| (11, 3) | 1.028         | 40                                |
| (9, 5)  | 1.001         | 42                                |
| (10, 5) | 0.988         | 36                                |
| (11, 1) | 0.976         | 82                                |
| (9, 7)  | 0.932         | 36                                |
| (12, 2) | 0.898         | 53                                |

<sup>a</sup> Shift in comparison to fluorescence emission for SWNTs in air

### 3, 4-Dichlorotoluene ( $\epsilon = 9.39$ , $\eta = 1.55$ , $D = 3.00$ , $f(\eta^2) = 0.483$ )

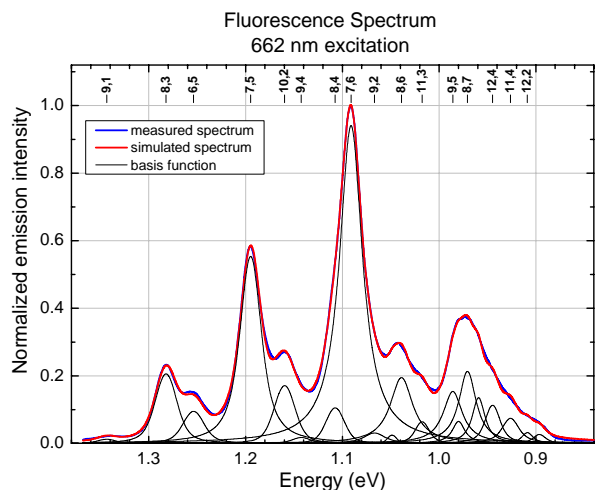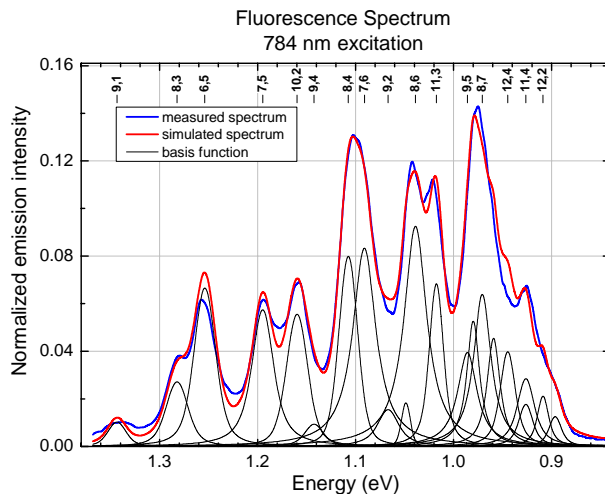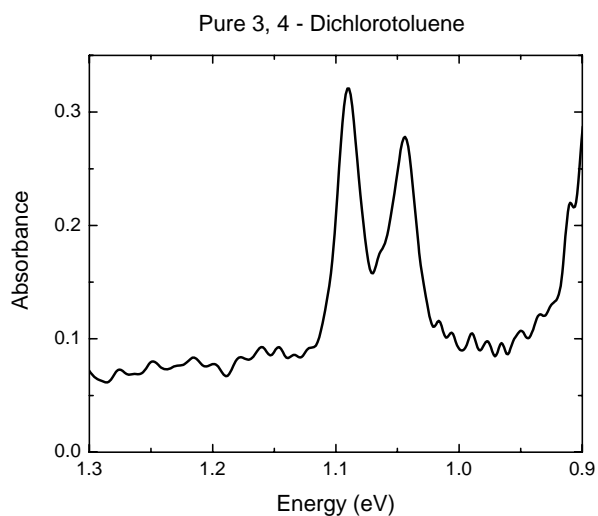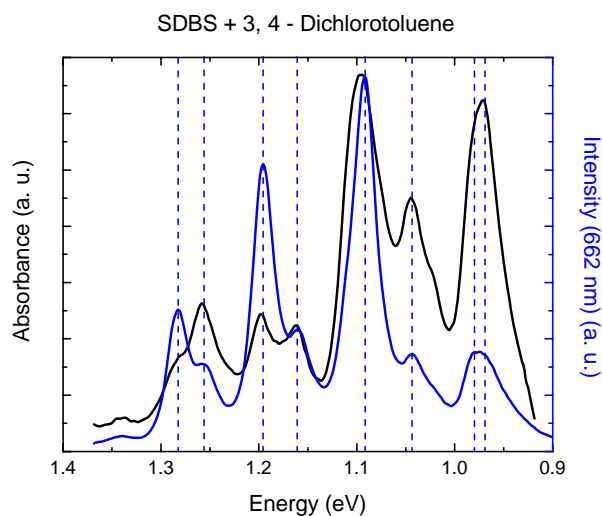

| Type    | $E_{11}$ (eV) | $E_{11}$ Shift (meV) <sup>a</sup> |
|---------|---------------|-----------------------------------|
| (8, 3)  | 1.282         | 86                                |
| (6, 5)  | 1.254         | 98                                |
| (7, 5)  | 1.195         | 79                                |
| (10, 2) | 1.160         | 64                                |
| (9, 4)  | 1.142         | 29                                |
| (7, 6)  | 1.091         | 69                                |
| (12, 1) | 1.049         | 44                                |
| (8, 6)  | 1.039         | 61                                |
| (11, 3) | 1.018         | 50                                |
| (9, 5)  | 0.986         | 57                                |
| (11, 1) | 0.980         | 78                                |
| (9, 7)  | 0.926         | 42                                |
| (12, 2) | 0.909         | 42                                |

<sup>a</sup> Shift in comparison to fluorescence emission for SWNTs in air

## 2-Heptanol ( $\epsilon = 9.72$ , $\eta = 1.42$ , $D = 1.71$ , $f(\eta^2) = 0.404$ )

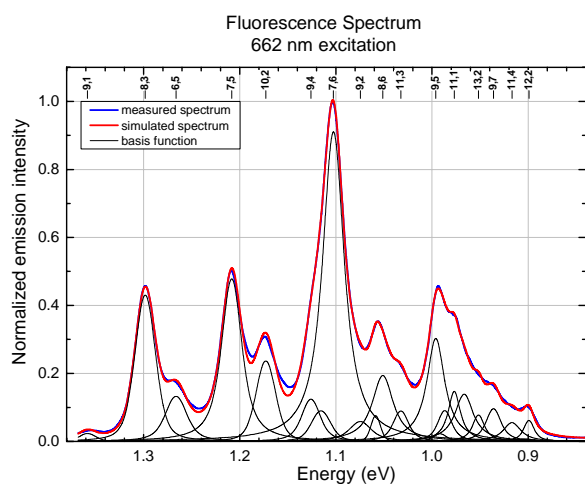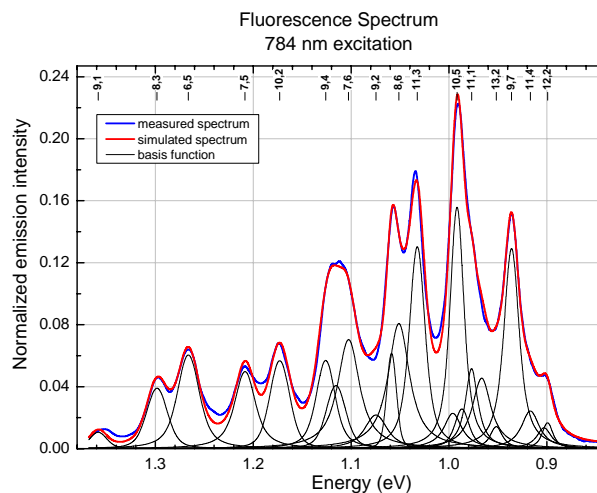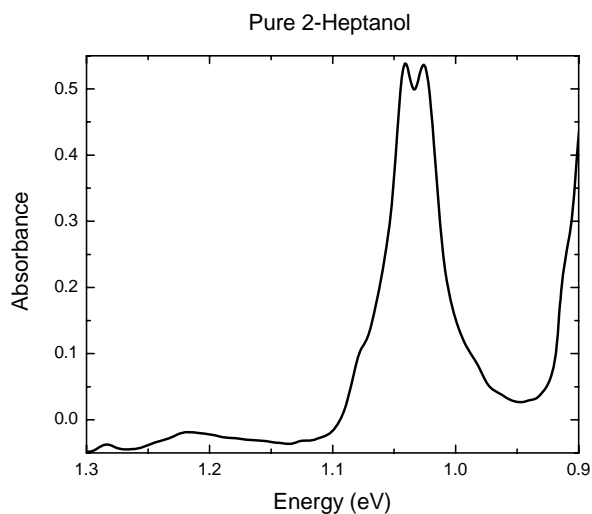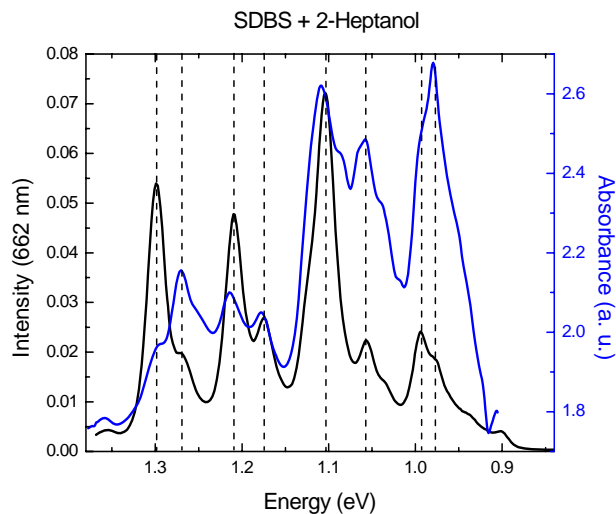

| Type    | $E_{11}$ (eV) | $E_{11}$ Shift (meV) <sup>a</sup> |
|---------|---------------|-----------------------------------|
| (8, 3)  | 1.299         | 69                                |
| (6, 5)  | 1.267         | 85                                |
| (7, 5)  | 1.209         | 65                                |
| (10, 2) | 1.173         | 51                                |
| (9, 4)  | 1.126         | 45                                |
| (7, 6)  | 1.102         | 58                                |
| (12, 1) | 1.059         | 34                                |
| (8, 6)  | 1.05          | 50                                |
| (11, 3) | 1.033         | 35                                |
| (9, 5)  | 0.995         | 48                                |
| (10, 5) | 0.992         | 32                                |
| (11, 1) | 0.976         | 82                                |
| (9, 7)  | 0.936         | 32                                |
| (12, 2) | 0.900         | 51                                |

<sup>a</sup> Shift in comparison to fluorescence emission for SWNTs in air



***o*-Dichlorobenzene** ( $\epsilon = 10.12$ ,  $\eta = 1.55$ ,  $D = 2.50$ ,  $f(\eta^2) = 0.483$ )

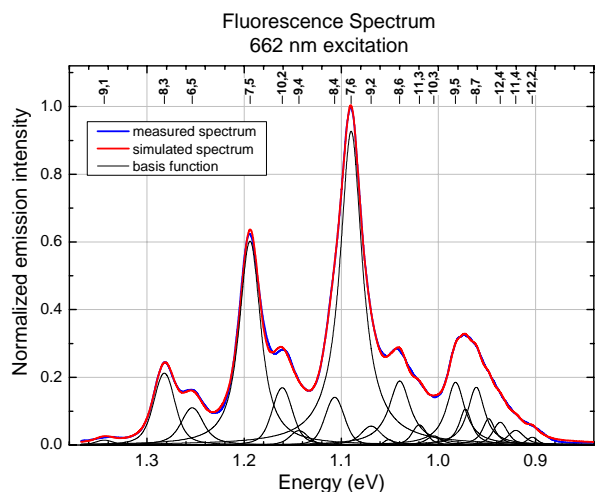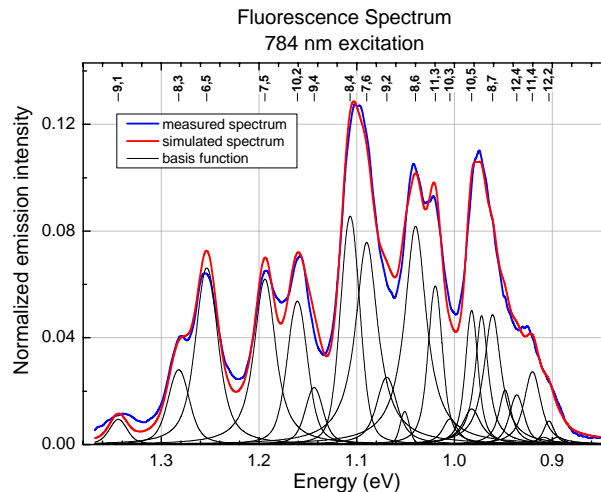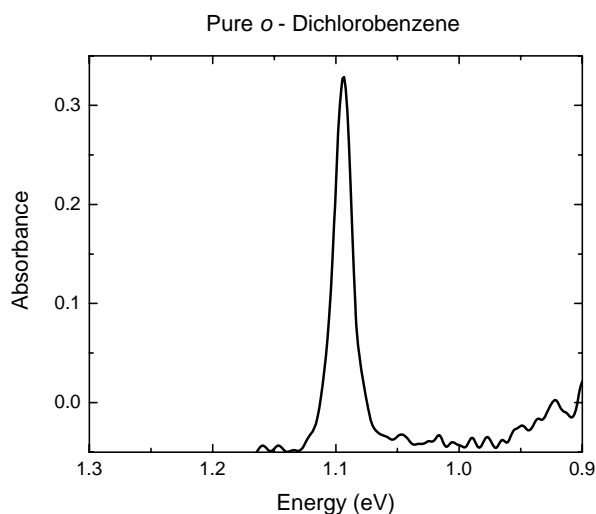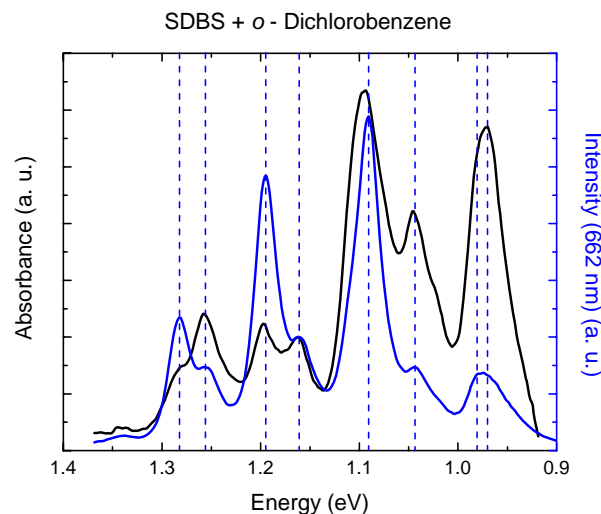

| Type    | $E_{11}$ (eV) | $E_{11}$ Shift (meV) <sup>a</sup> |
|---------|---------------|-----------------------------------|
| (8, 3)  | 1.282         | 86                                |
| (6, 5)  | 1.253         | 99                                |
| (7, 5)  | 1.194         | 80                                |
| (10, 2) | 1.161         | 63                                |
| (9, 4)  | 1.144         | 27                                |
| (7, 6)  | 1.090         | 70                                |
| (12, 1) | 1.051         | 42                                |
| (8, 6)  | 1.040         | 60                                |
| (11, 3) | 1.020         | 48                                |
| (9, 5)  | 0.982         | 61                                |
| (10, 5) | 0.982         | 42                                |
| (11, 1) | 0.972         | 86                                |
| (12, 2) | 0.903         | 48                                |

<sup>a</sup> Shift in comparison to fluorescence emission for SWNTs in air
